# Supplementary material for: “All Polyimide” Mixed Matrix Membranes for High Performance Gas Separation
Source: MDPI journal article supplement (doi:10.3390/polym13081329), 2021-04-19
Supplement: s1 [file s1]

# Supporting Information

## **“All Polyimide” Mixed Matrix Membranes for High Performance Gas Separation**

Li Maijun<sup>1</sup>, Zheng Zhibo<sup>1\*</sup>, Zhang zhiguang<sup>2</sup>, Li Nanwen<sup>2\*</sup>, Liu Siwei<sup>2</sup>, Chi Zhenguo<sup>1</sup>, Xu Jiarui<sup>1</sup>, and Zhang Yi<sup>1\*</sup>

<sup>†</sup>PCFM Lab, GD HPPC Lab, Guangdong Engineering Technology Research Centre for High-performance Organic and Polymer Photoelectric Functional Films, State Key Laboratory of Optoelectronic Materials and Technologies, School of Chemistry, Sun Yat-sen University, Guangzhou 510275, China.

<sup>‡</sup>State Key Laboratory of Coal Conversion, Institute of Coal Chemistry, Chinese Academy of Sciences. Taiyuan, China

|                                                                                               |   |
|-----------------------------------------------------------------------------------------------|---|
| <b>Scheme S1.</b> Synthetic procedure and structures of TAPB and BP. ....                     | 2 |
| <b>Scheme S2.</b> Synthetic procedure and structures of TAPT and TP. ....                     | 3 |
| <b>Figure S1.</b> <sup>13</sup> C CP/MAS NMR spectra of AP. ....                              | 4 |
| <b>Figure S2.</b> <sup>13</sup> C CP/MAS NMR spectra of BP. ....                              | 4 |
| <b>Figure S3.</b> <sup>13</sup> C CP/MAS NMR spectra of TP. ....                              | 5 |
| <b>Figure S4.</b> FTIR spectra of AP, BP and TP. ....                                         | 5 |
| <b>Figure S5.</b> ATR-FTIR spectra of 6FDA-Durene and “all polyimide” MMMs. ....              | 6 |
| <b>Figure S6.</b> DLS of AP, BP, TP and SEM of BP, TP. ....                                   | 7 |
| <b>Figure S7.</b> Cross-section SEM images of 5BP/6FDA-Durene and 5TP/6FDA-Durene. ....       | 7 |
| <b>Figure S8.</b> XRD patterns of microporous PIs, 6FDA-Durene and “all polyimide” MMMs. .... | 8 |
| <b>Figure S9.</b> TGA of BP, TP, 5BP/6FDA-Durene and 5TP/6FDA-Durene. ....                    | 8 |
| <b>Figure S10.</b> Stress-strain of 5BP/6FDA-Durene, 5TP/6FDA-Durene and 6FDA-Durene. ....    | 9 |

|                                                                                                                           |    |
|---------------------------------------------------------------------------------------------------------------------------|----|
| <b>Figure S11.</b> DMA of 6FDA-Durene, 5AP/6FDA-Durene and 10AP/6FDA-Durene at 1 Hz, 2 Hz, 5 Hz, 10 Hz respectively ..... | 9  |
| <b>Figure S12.</b> Henry fit for idea adsorption solution theory (IAST) of AP, BP and TP .....                            | 10 |
| <b>Figure S13.</b> Gas permeability and ideal selectivity of 5AP/6FDA-Durene in different temperature.....                | 10 |
| <b>Table S1.</b> Assignments for <b>Figure. S1-S3</b> .....                                                               | 10 |
| <b>Table S2.</b> The ratio of $P_{CO_2}$ of PI base MMMs to pristine PI membranes.....                                    | 10 |
| <b>Table S3.</b> Henry's law region fit for IAST of microporous PIs. ....                                                 | 15 |
| <b>Table S4.</b> 5AP/6FDA-Durene activation energy ( $E_p$ ) of permeation for $CO_2$ , $N_2$ and $CH_4$ .....            | 15 |
| <b>REFERENCES</b> .....                                                                                                   | 15 |

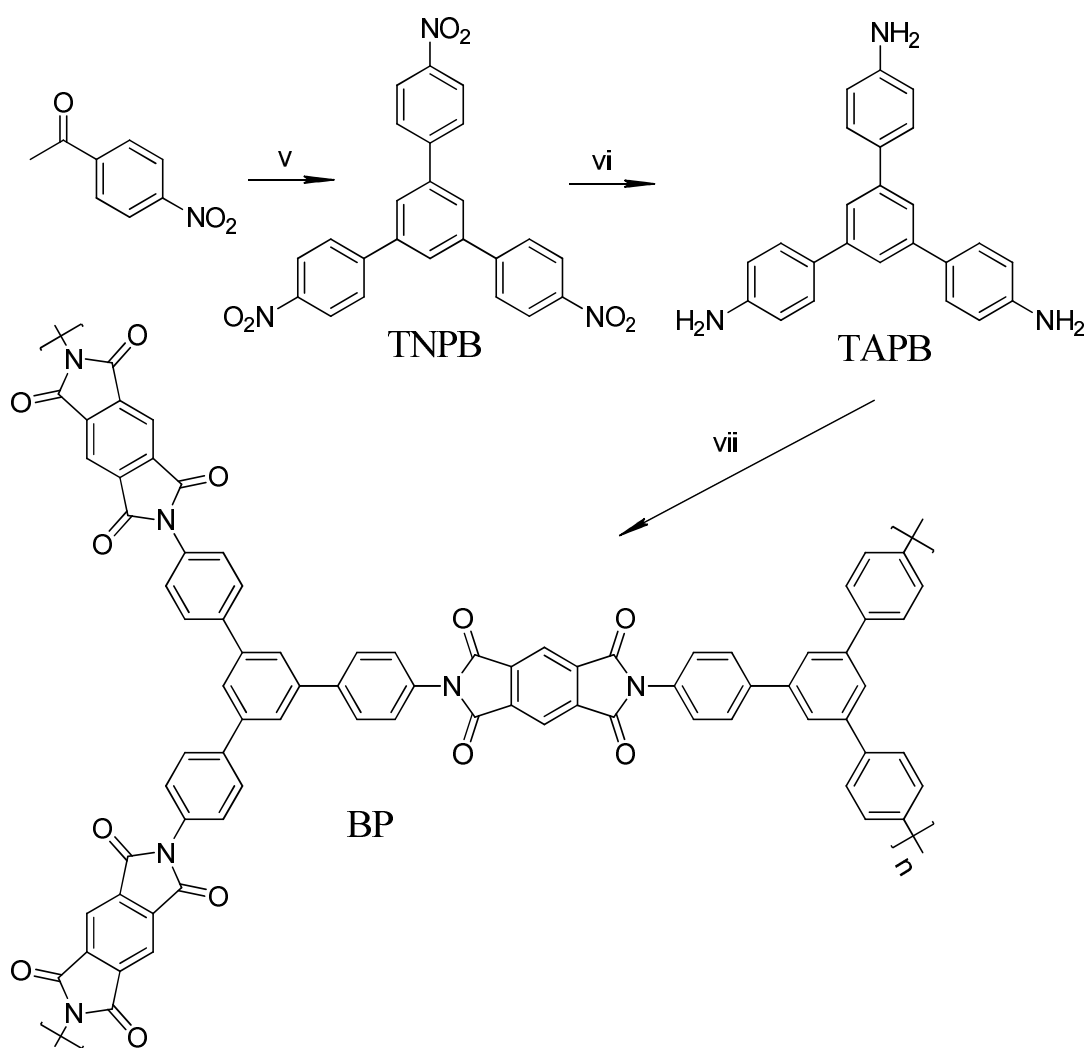

**Scheme S1.** Synthetic procedure and structures of TAPB and BP. Reagents and conditions: (v) thionyl chloride and ethanol reflux for 4 h; (vi)  $H_2N-NH_2 \cdot H_2O$ ,  $Pd/C$  and ethanol reflux for 24 h; (vii) isoquinoline, NMP and mesitylene mix solvent, heating schedule.

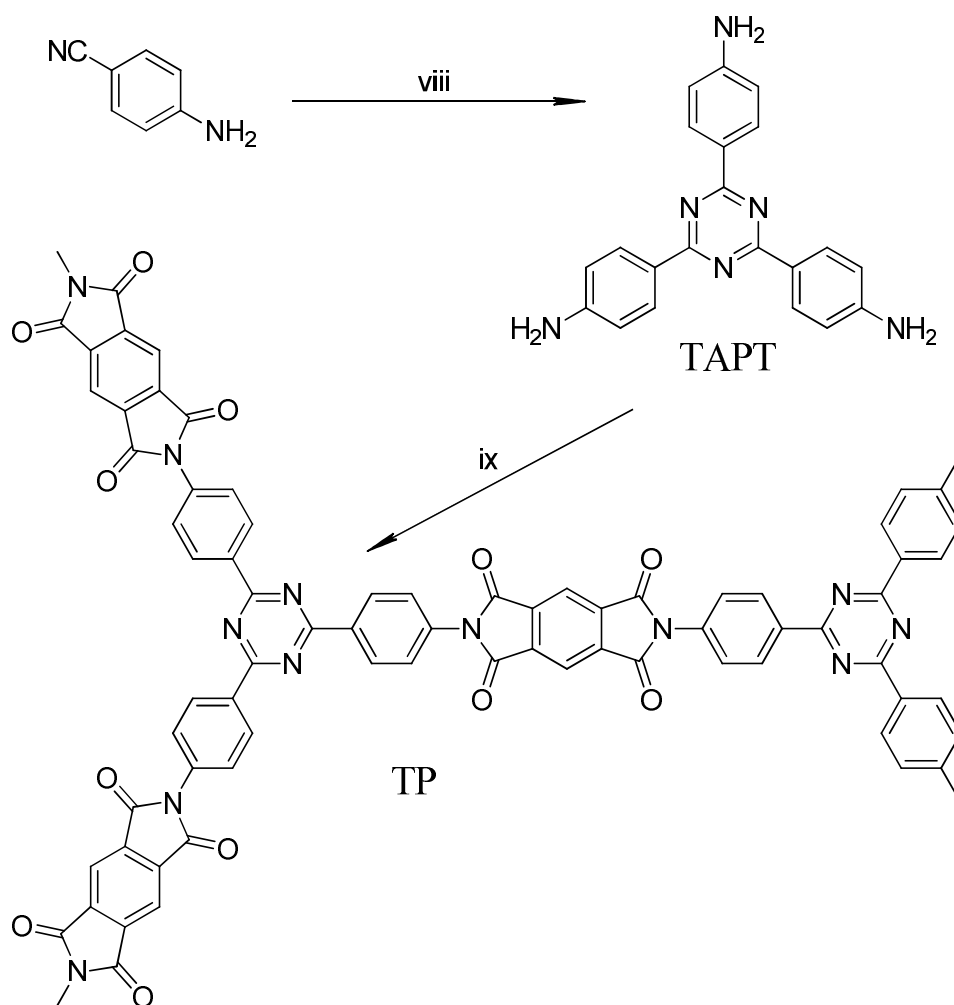

**Scheme S2.** Synthetic procedure and structures of TAPT and TP. Reagents and conditions: (viii) trifluoromethanesulfonic acid and 4-aminobenzonitrile reaction in ice bath for 12 h; (ix) isoquinoline, NMP and mesitylene mix solvent, heating schedule.

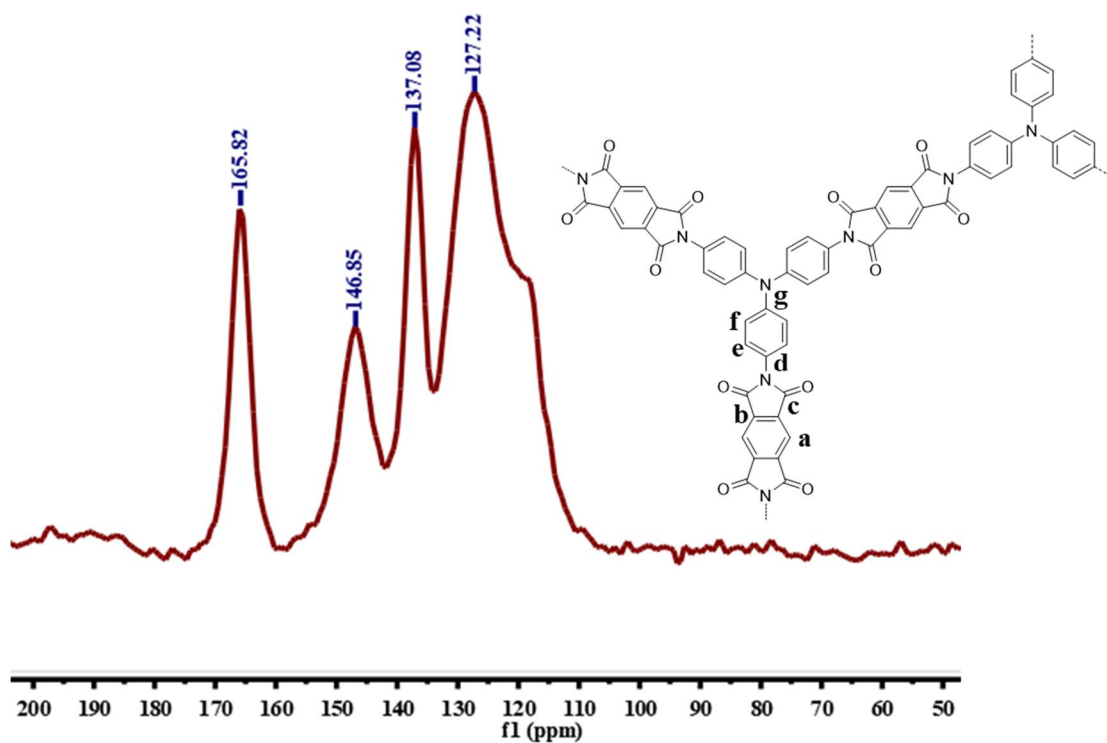

Figure S1.  $^{13}\text{C}$  CP/MAS NMR spectra of AP.

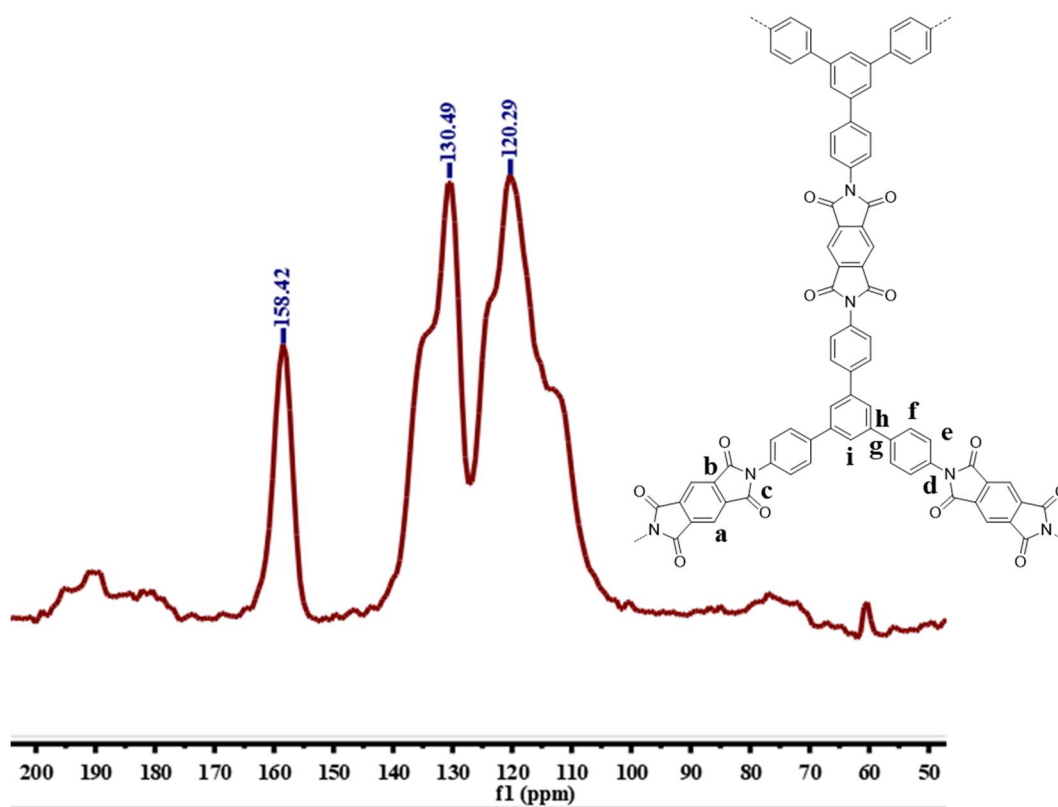

Figure S2.  $^{13}\text{C}$  CP/MAS NMR spectra of BP.

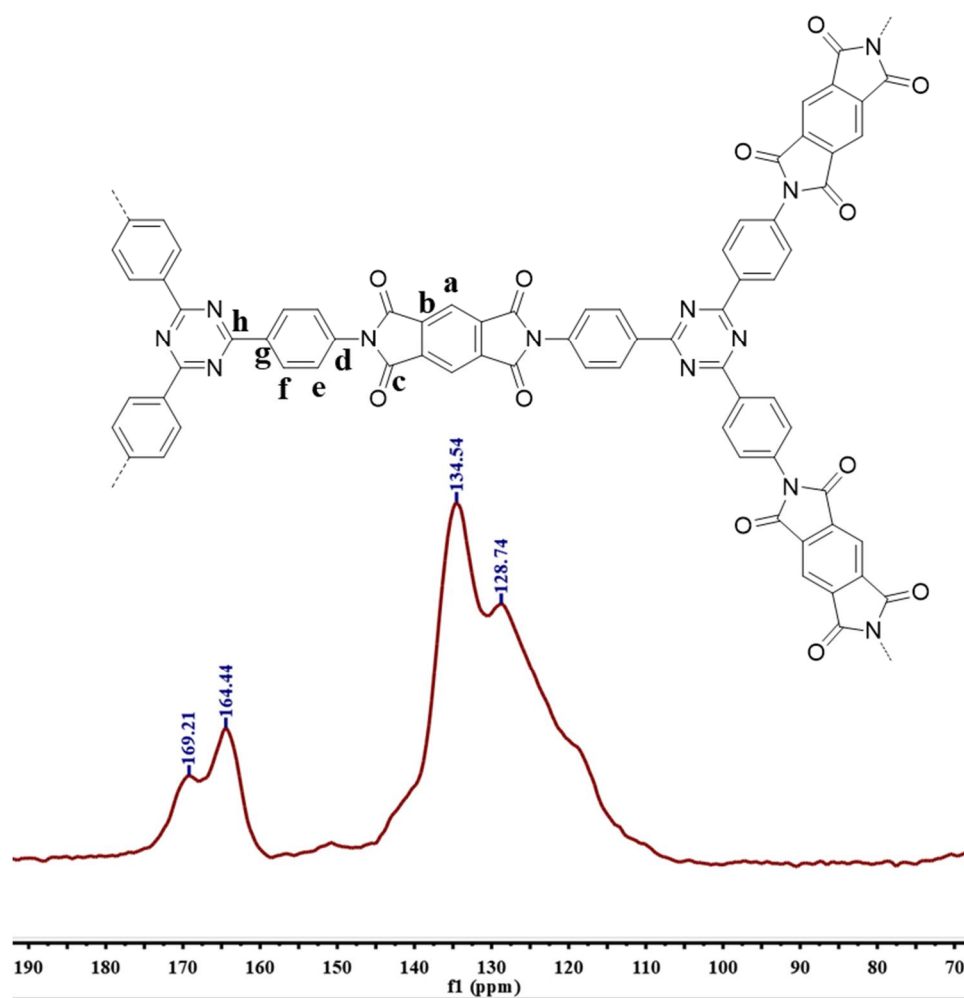

Figure S3.  $^{13}\text{C}$  CP/MAS NMR spectra of TP.

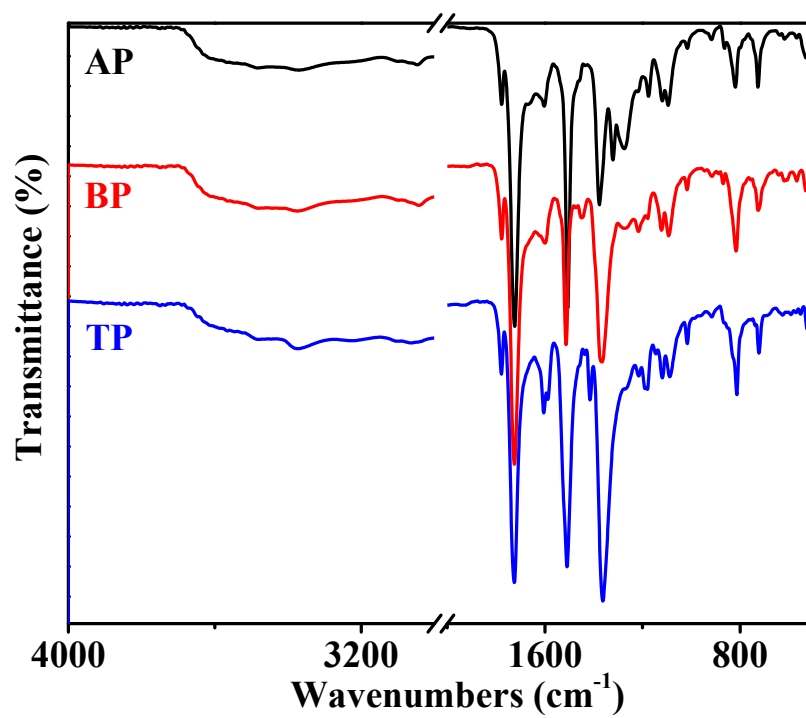

Figure S4. FTIR spectra of AP, BP and TP.

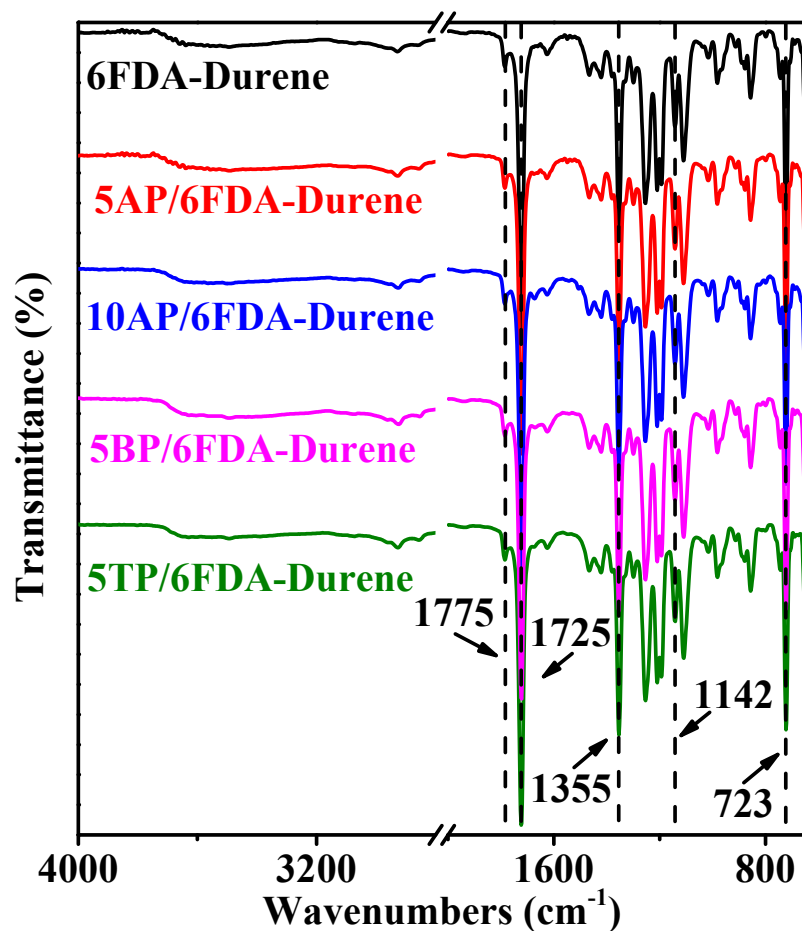

Figure S5. ATR-FTIR spectra of 6FDA-Durene and “all polyimide” MMMs.

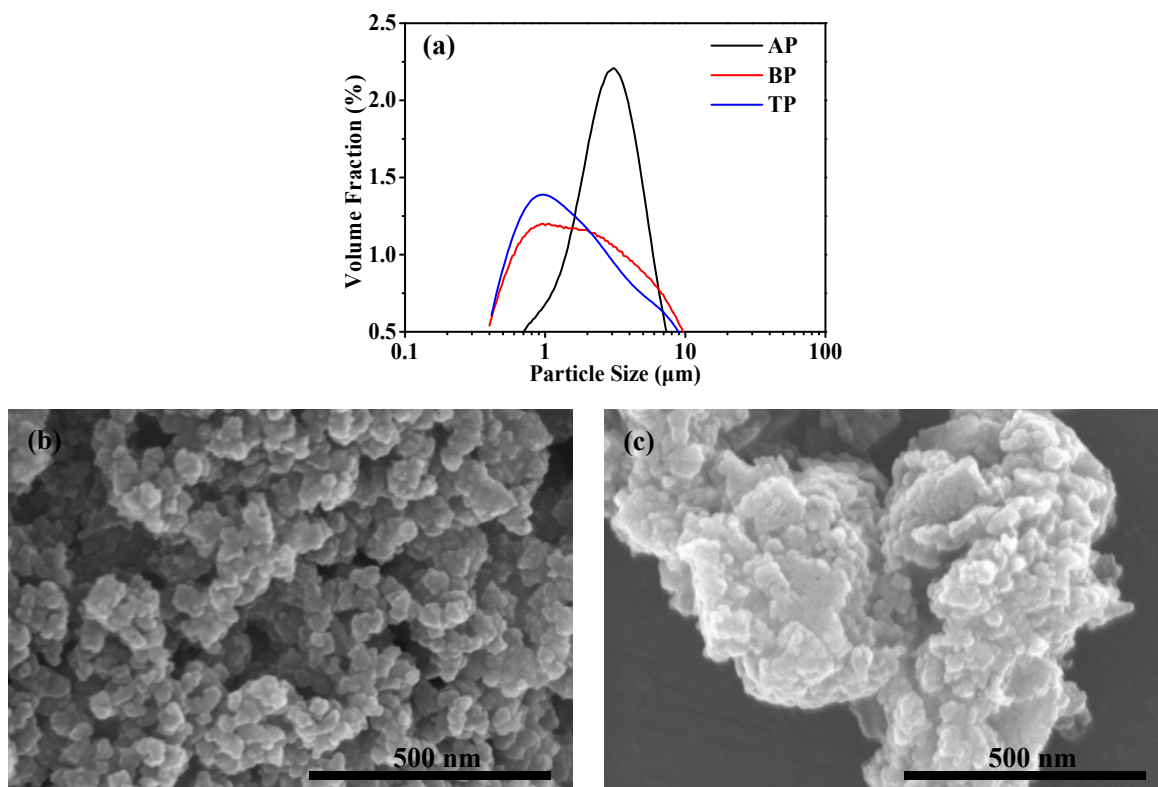

**Figure S6.** (a) DLS of AP, BP and TP; (b) SEM of BP; (c) SEM of TP .

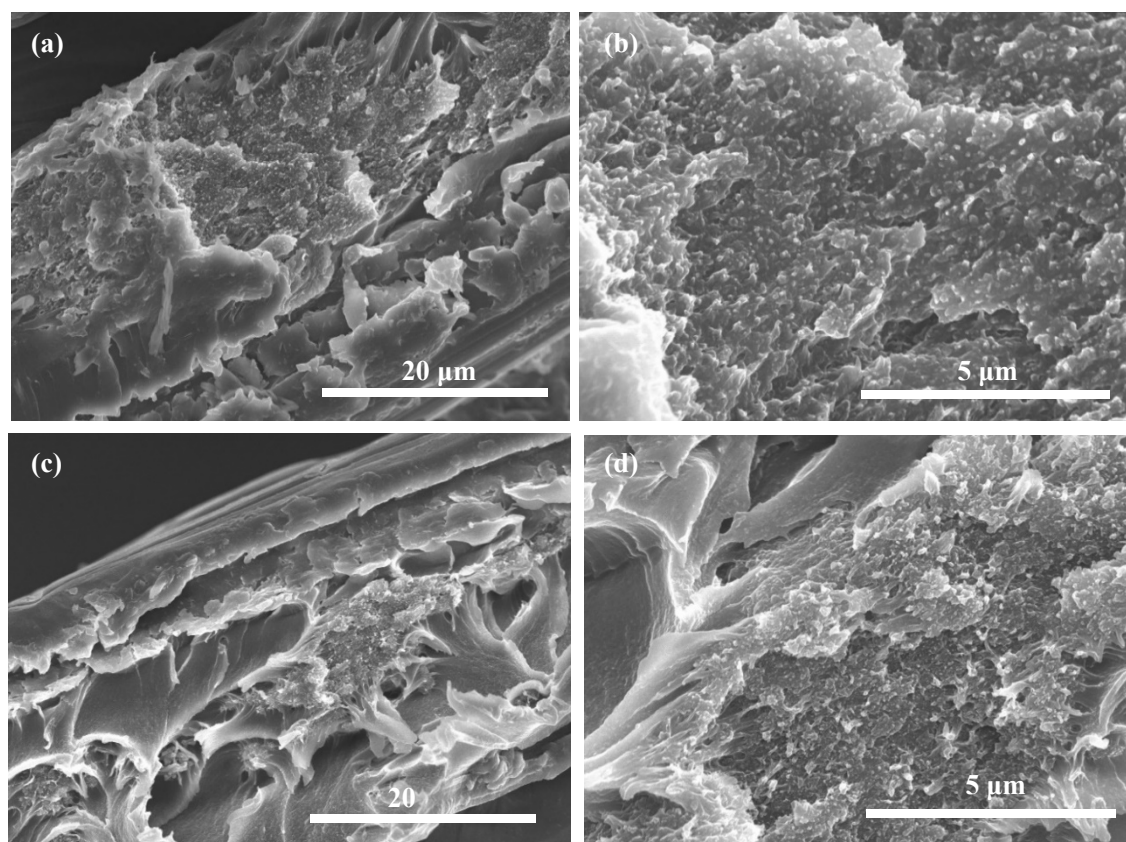

**Figure S7.** Cross-section SEM images of (a, b) 5BP/6FDA-Durene and amplification; (c, d) 5TP/6FDA-Durene and amplification

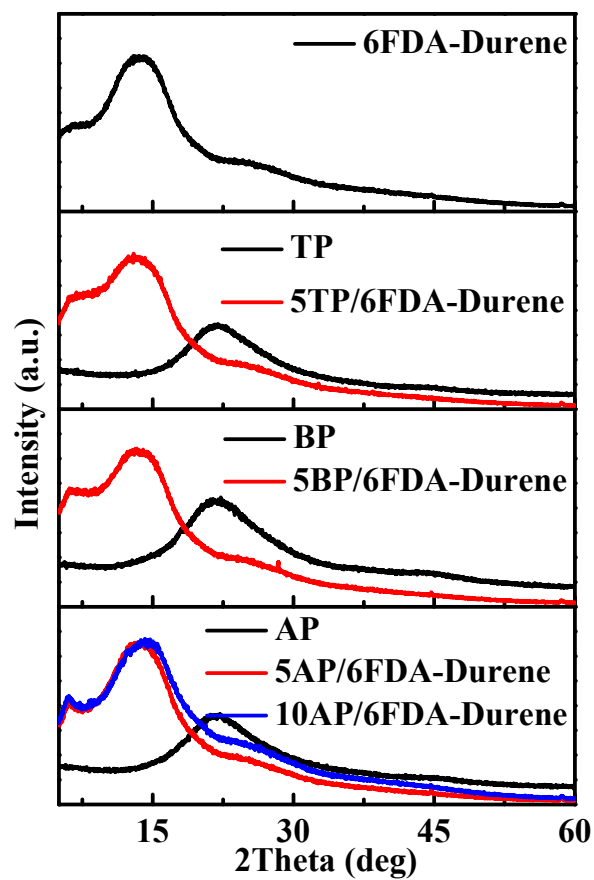

Figure S8. XRD patterns of microporous PIs, 6FDA-Durene and “all polyimide” MMMs.

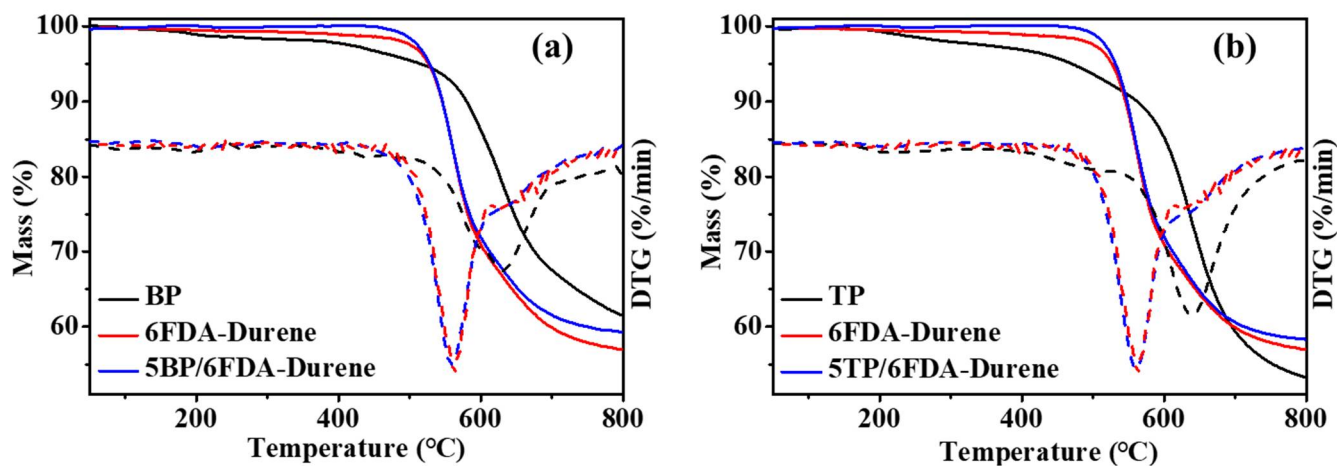

Figure S9. TGA (solid line) and DTG (dotted line) of (a) BP and the MMMs with BP loading; (b) TP and the MMMs with TP loading



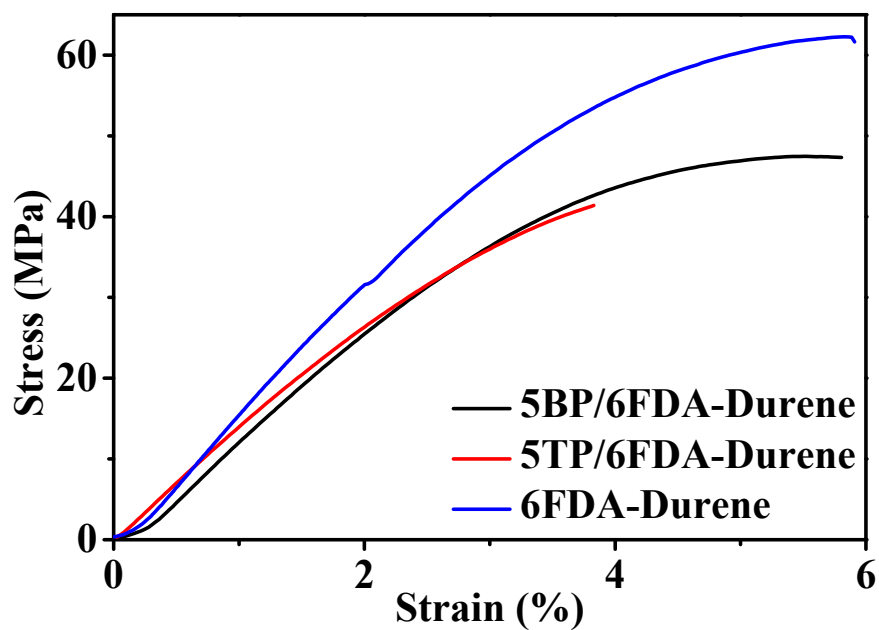

**Figure S10.** stress-strain curves of 5BP/6FDA-Durene, 5TP/6FDA-Durene and 6FDA-Durene

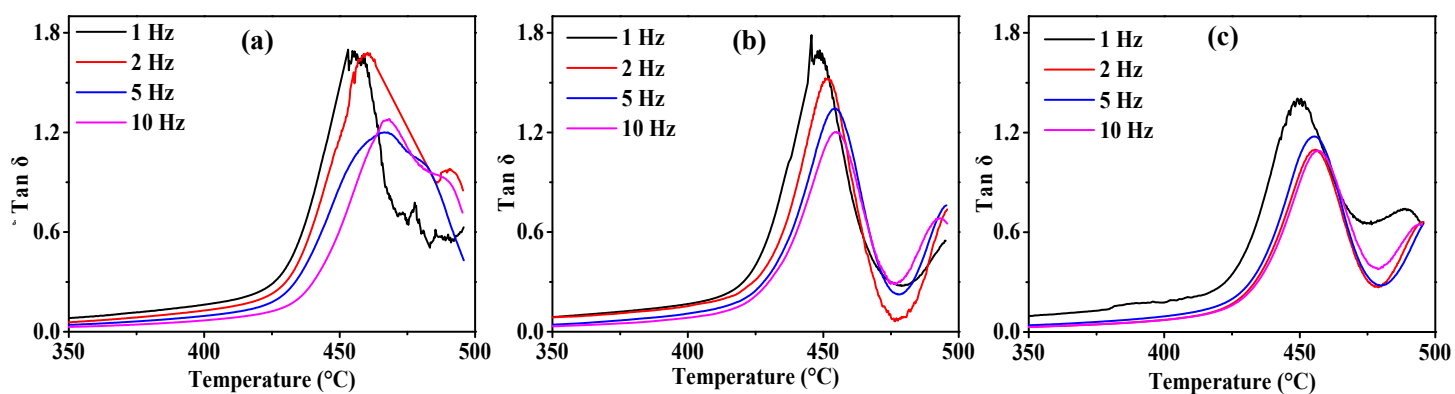

**Figure S11.** DMA curves of (a) 6FDA-Durene; (b) 5AP/6FDA-Durene; (c) 10AP/6FDA-Durene at 1 Hz, 2 Hz, 5 Hz, 10 Hz respectively

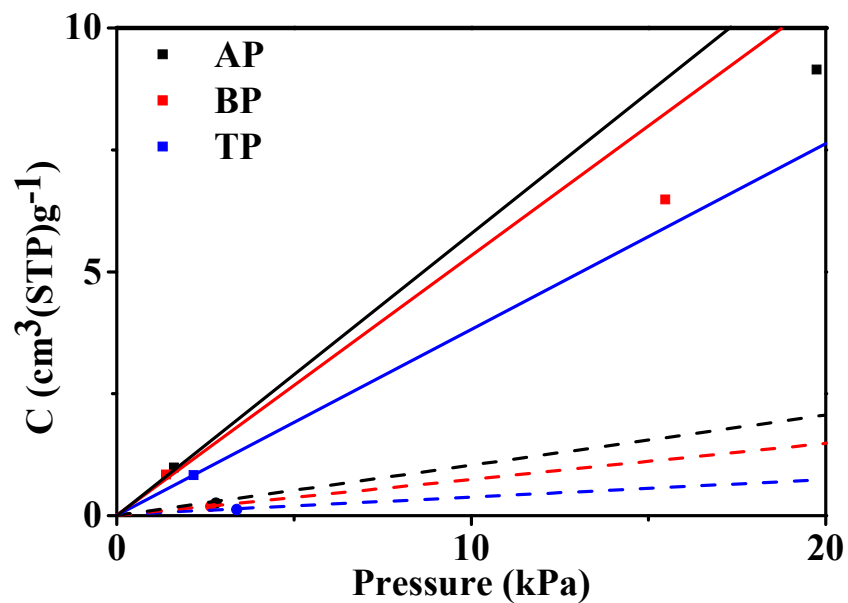

Figure S12. Henry fit for ideal adsorption solution theory (IAST) of AP, BP and TP.

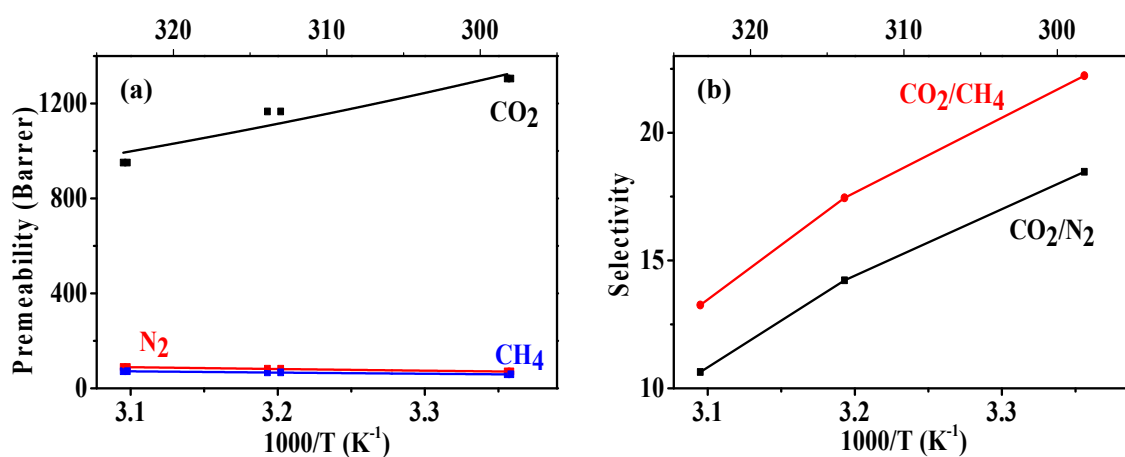

Figure S13. (a) Gas permeability and (b) ideal selectivity of 5AP/6FDA-Durene at 100 psi in different temperature.

Table S1. Assignments for Figure. S1-S3

|    | a     | b     | c     | d     | e     | f     | g     | h     | i     |
|----|-------|-------|-------|-------|-------|-------|-------|-------|-------|
| AP | 125.2 | 137.1 | 165.8 | 127.2 | 122.5 | 134.2 | 146.9 |       |       |
| BP | 125.2 | 135.5 | 158.4 | 130.5 | 130.5 | 128.1 | 136.4 | 137.5 | 120.3 |
| TP | 125.2 | 134.5 | 164.4 | 132.7 | 128.7 | 127.7 | 130.3 | 169.2 |       |

Table S2. The ratio of  $P_{CO_2}$  of PI base MMMs to pristine PI membranes

| Matrix | Filler | Filler content (wt%) | $P_{CO_2}$ (Barrer) | $P_{CO_2}$ increment Ratio | Ref       |
|--------|--------|----------------------|---------------------|----------------------------|-----------|
| 6FDA-  | /      |                      | 500.17              | 1                          | This work |

|             |                 |      |         |      |     |
|-------------|-----------------|------|---------|------|-----|
| Durene      | AP              | 5    | 1291.13 | 2.58 |     |
|             | AP              | 10   | 959.16  | 1.92 |     |
|             | BP              | 5    | 1047.43 | 2.09 |     |
|             | TP              | 5    | 753.07  | 1.51 |     |
|             | /               | 0    | 805     | 1    |     |
| 6FDA-Durene | ZIF-71 (30 nm)  | 21.2 | 2560    | 3.18 | [1] |
|             | ZIF-71 (200 nm) | 21.1 | 2744    | 3.41 |     |
|             | ZIF-71 (600 nm) | 19.3 | 1656    | 2.06 |     |
|             | /               | 0    | 625     | 1    |     |
|             | NH2-MIL-101     | 10   | 1365    | 2.18 |     |
|             | CNT             | 5    | 730     | 1.17 |     |
| 6FDA-Durene | CNT             | 10   | 1100    | 1.76 | [2] |
|             | CNT             | 15   | 1700    | 2.72 |     |
|             | CNT-MIL         | 5    | 800     | 1.28 |     |
|             | CNT-MIL         | 10   | 1100    | 1.76 |     |
|             | CNT-MIL         | 15   | 1625    | 2.60 |     |
|             | /               | 0    | 800     | 1    |     |
| 6FDA-Durene | HKUST-1         | 10   | 1300    | 1.63 | [3] |
|             | un-HKUST-IL     | 10   | 400     | 0.5  |     |
|             | HKUST-IL        | 10   | 1100    | 1.38 |     |
|             | /               | 0    | 1280    | 1    |     |
|             | PSM-MOF         | 2.5  | 1310    | 1.02 |     |
|             | PSM-MOF         | 5    | 1340    | 1.05 |     |
|             | PSM-MOF         | 7.5  | 1370    | 1.07 |     |
|             | PSM-MOF         | 10   | 1400    | 1.09 |     |
|             | PSM-MOF         | 15   | 1470    | 1.15 |     |
| 6FDA-Durene | PSM-MOF         | 20   | 1540    | 1.20 | [4] |
|             | PSM-MOF         | 25   | 1640    | 1.28 |     |
|             | PSM-MOF         | 30   | 1710    | 1.34 |     |
|             | PSM-MOF         | 35   | 1810    | 1.41 |     |
|             | PSM-MOF         | 40   | 1890    | 1.48 |     |
|             | PSM-MOF         | 100  | 3515    | 2.75 |     |
|             | UiO-66-NH2      | 15   | 1990    | 1.55 |     |
|             | UiO-66-NH2      | 30   | 3260    | 2.55 |     |
| 6FDA-Durene | /               | 0    | 1143    | 1    | [5] |
|             | ZIF-71          | 10   | 2049    | 1.79 |     |
|             | /               | 0    | 300     | 1    |     |
| 6FDA-Durene | PgC5Cu          | 1    | 310     | 1.03 |     |
|             | PgC5Cu          | 2    | 360     | 1.2  | [6] |
|             | PgC5Cu          | 3    | 410     | 1.37 |     |
|             | /               | 0    | 455.2   | 1    |     |
| 6FDA-Durene | NaX             | 5    | 620     | 1.36 |     |
|             | NaX             | 10   | 780     | 1.71 | [7] |
|             | NaX             | 15   | 891.3   | 1.96 |     |

|        |                |     |         |      |      |
|--------|----------------|-----|---------|------|------|
|        | NaX            | 20  | 1000    | 2.20 |      |
|        | [Cu(6L)]2+@13X | 5   | 891.3   | 1.96 |      |
|        | [Cu(6L)]2+@13X | 10  | 960     | 2.11 |      |
|        | [Cu(6L)]2+@13X | 15  | 1034.1  | 2.27 |      |
|        | [Cu(6L)]2+@13X | 20  | 1060    | 2.33 |      |
| 6FDA-  | /              | 0   | 626     | 1    |      |
| Durene | Ni(dobdc)      | 21  | 1035    | 1.65 | [8]  |
| 6FDA-  | /              | 0   | 959     | 1    |      |
| Durene | ZIF-71         | 10  | 1539    | 1.60 | [9]  |
|        | /              | 0   | 669.12  | 1    |      |
|        | ZIF-67         | 10  | 779.51  | 1.16 |      |
|        | ZIF-67         | 20  | 1529.86 | 2.29 |      |
| 6FDA-  | ZIF-67-IL1     | 10  | 779.01  | 1.16 |      |
| Durene | ZIF-67-IL1     | 20  | 1254.64 | 1.88 | [10] |
|        | ZIF-67-IL2     | 10  | 1030.96 | 1.54 |      |
|        | ZIF-67-IL2     | 20  | 1426.12 | 2.13 |      |
|        | ZIF-67-IL3     | 10  | 672.79  | 1.01 |      |
|        | ZIF-67-IL3     | 20  | 889.87  | 1.33 |      |
|        | /              | 0   | 460     | 1    |      |
|        | Zeolite T      | 0.5 | 700     | 1.52 |      |
|        | Zeolite T      | 1   | 843.6   | 1.83 |      |
| 6FDA-  | Zeolite T      | 3   | 700     | 1.52 |      |
| Durene | Zeolite T      | 5   | 620     | 1.35 | [11] |
|        | Zeolite T      | 7   | 390     | 0.85 |      |
|        | Zeolite T      | 10  | 380     | 0.83 |      |
|        | Zeolite T      | 15  | 370     | 0.80 |      |
|        | /              | 0   | 546     | 1    |      |
| 6FDA-  | nano           | 23  | 782     | 1.43 |      |
| DAM    | Mg2(dobpdc)    | 23  | 782     | 1.43 | [12] |
|        | nano mmen-     | 23  | 1056    | 1.93 |      |
|        | Mg2(dobpdc)    | 23  | 1056    | 1.93 |      |
|        | /              | 0   | 444     | 1    |      |
| 6FDA-  | PPN            | 15  | 595     | 1.34 |      |
| DAM    | PPN            | 30  | 710     | 1.60 | [13] |
|        | /              | 0   | 970     | 1    |      |
|        | HKUST-1        | 10  | 1450    | 1.49 |      |
| 6FDA-  | HKUST-1        | 20  | 1690    | 1.74 |      |
| DAM    | HKUST-1        | 30  | 2360    | 2.43 | [14] |
|        | branch HKUST-1 | 10  | 1600    | 1.65 |      |
|        | branch HKUST-1 | 20  | 1920    | 1.98 |      |
|        | branch HKUST-1 | 30  | 2480    | 2.56 |      |
|        | /              | 0   | 420     | 1    |      |
| 6FDA-  | PgC5Cu         | 1   | 400     | 0.95 |      |
| DAM    | PgC5Cu         | 2   | 580     | 1.38 | [6]  |

|          |                        |    |      |      |      |
|----------|------------------------|----|------|------|------|
|          | PgC5Cu                 | 3  | 480  | 1.14 |      |
|          | /                      | 0  | 590  | 1    |      |
| 6FDA-DAM | ns-CuBDC               | 2  | 570  | 0.97 | [15] |
|          | ns-CuBDC               | 4  | 430  | 0.73 |      |
| 6FDA-DAM | /                      | 0  | 518  | 1    | [8]  |
|          | Ni(dobdc)              | 23 | 715  | 1.38 |      |
|          | /                      | 0  | 570  | 1    |      |
| 6FDA-DAM | G1NP                   | 25 | 1050 | 1.84 | [16] |
|          | G2NP                   | 25 | 1920 | 3.37 |      |
| 6FDA-DAM | /                      | 0  | 1000 | 1    | [17] |
|          | ZMOF                   | 20 | 1600 | 1.6  |      |
|          | /                      | 0  | 540  | 1    |      |
| 6FDA-DAM | 3D-COF                 | 10 | 850  | 1.57 | [18] |
|          | 3D-COF                 | 15 | 1280 | 2.37 |      |
|          | 2D-COF                 | 10 | 640  | 1.19 |      |
|          | /                      | 0  | 380  | 1    |      |
|          | NH2-MIL-53(Al)<br>(NP) | 5  | 440  | 1.16 |      |
| 6FDA-DAM | NH2-MIL-53(Al)<br>(NP) | 10 | 480  | 1.26 |      |
|          | NH2-MIL-53(Al)<br>(NP) | 15 | 600  | 1.58 |      |
|          | NH2-MIL-53(Al)<br>(NP) | 20 | 700  | 1.84 |      |
|          | /                      | 0  | 8.2  | 1    |      |
|          | NH2-MIL-53(Al)<br>(NP) | 8  | 9.5  | 1.16 | [19] |
|          | NH2-MIL-53(Al)<br>(NP) | 16 | 7.8  | 0.95 |      |
| Matrimid | NH2-MIL-53(Al)<br>(NR) | 8  | 8    | 0.98 |      |
|          | NH2-MIL-53(Al)<br>(NP) | 16 | 7.8  | 0.95 |      |
|          | NH2-MIL-53(Al)<br>(MN) | 8  | 8    | 0.98 |      |
|          | NH2-MIL-53(Al)<br>(MN) | 16 | 6.5  | 0.79 |      |
|          | /                      |    | 6.82 | 1    |      |
| Matrimid | MMIF                   | 10 | 8.1  | 1.19 | [20] |
|          | MMIF                   | 20 | 8.65 | 1.27 |      |
|          | /                      | 0  | 8.6  | 1    |      |
| matrimid | PPN                    | 15 | 20   | 2.33 | [13] |
|          | PPN                    | 30 | 61   | 7.09 |      |
| matrimid | /                      | 0  | 9.55 | 1    | [8]  |

|              |                             |     |      |      |      |
|--------------|-----------------------------|-----|------|------|------|
|              | Ni(dobdc)                   | 23  | 9.31 | 0.97 |      |
|              | /                           | 0   | 8    | 1    |      |
|              | UiO-66-NH <sub>2</sub>      | 12  | 18   | 2.25 |      |
|              | UiO-66-NH <sub>2</sub>      | 23  | 24   | 3    |      |
|              | UiO-66-NH <sub>2</sub>      | 40  | 27.5 | 3.44 |      |
| matrimid     | UiO-66-NH <sub>2</sub> -Ipa | 12  | 20   | 2.5  | [21] |
|              | UiO-66-NH <sub>2</sub> -Ipa | 23  | 29   | 3.63 |      |
|              | UiO-66-NH <sub>2</sub> -Ipa | 40  | 32   | 4    |      |
|              | UiO-66-NH <sub>2</sub> -Ic  | 23  | 22.5 | 2.81 |      |
|              | UiO-66-NH <sub>2</sub> -Isa | 23  | 20   | 2.5  |      |
|              | /                           | 0   | 10   | 1    |      |
|              | CMS                         | 17  | 10.3 | 1.03 |      |
| Matrimid     | CMS                         | 19  | 10.6 | 1.06 | [22] |
|              | CMS                         | 33  | 11.5 | 1.15 |      |
|              | CMS                         | 36  | 12.6 | 1.26 |      |
|              | /                           | 0   | 7.6  | 1    |      |
|              | PPI-1                       | 20  | 10.3 | 1.36 |      |
| matrimid     | PPI-2                       | 10  | 11.3 | 1.49 | [23] |
|              | PPI-2                       | 20  | 16.8 | 2.21 |      |
|              | PPI-3                       | 20  | 20.9 | 2.75 |      |
|              | /                           | 0   | 5.78 | 1    |      |
|              | b-CuBDC                     | 7.9 | 5.21 | 0.90 |      |
| matrimid     | ns-CuBDC                    | 7.9 | 4.09 | 0.70 | [24] |
|              | ns-CuBDC                    | 8.3 | 5.03 | 0.87 |      |
|              | ns-CuBDC                    | 1.7 | 5.38 | 0.93 |      |
|              | ns-Cu(2,6-NDC)              | 7.6 | 6.28 | 1.09 |      |
|              | /                           | 0   | 20   | 1    |      |
| 6FDA-ODA     | Cd-6F                       | 10  | 38   | 1.9  | [25] |
|              | Cd-6F                       | 10  | 30   | 1.5  |      |
|              | Cd-6F                       | 10  | 41   | 2.05 |      |
|              | /                           | 0   | 71   | 1    |      |
| 6FDA-6FpDA   | PPN                         | 15  | 131  | 1.85 | [13] |
|              | PPN                         | 30  | 190  | 2.68 |      |
|              | /                           | 0   | 285  | 1    |      |
|              | ZIF-8                       | 7   | 560  | 1.96 |      |
|              | ZIF-8                       | 20  | 896  | 3.14 |      |
| TB-polyimide | ZIF-8                       | 30  | 1437 | 5.04 | [26] |
|              | PDZIF-8                     | 7   | 380  | 1.33 |      |
|              | PDZIF-8                     | 20  | 702  | 2.46 |      |
|              | PDZIF-8                     | 30  | 1056 | 3.71 |      |
|              | /                           | 0   | 55.8 | 1    |      |
| 6FDA-DAT     | Ni(dobdc)                   | 15  | 63.9 | 1.15 | [8]  |
|              | /                           | 0   | 9    | 1    |      |
| 6FBI         | ZIF-8                       | 10  | 11.8 | 1.31 | [27] |

|          |       |    |      |      |      |
|----------|-------|----|------|------|------|
| Ulten    | ZIF-8 | 20 | 20.3 | 2.26 | [22] |
|          | ZIF-8 | 25 | 25.4 | 2.82 |      |
|          | ZIF-8 | 30 | 50.9 | 5.65 |      |
|          | /     | 0  | 1.45 | 1    |      |
|          | CMS   | 16 | 2.51 | 1.73 |      |
|          | CMS   | 20 | 2.9  | 2    |      |
|          | CMS   | 35 | 4.48 | 3.09 |      |
| 6FDA-IMM | /     | 0  | 224  | 1    | [23] |
|          | PPI-1 | 20 | 202  | 0.90 |      |
|          | PPI-2 | 20 | 270  | 1.21 |      |
|          | PPI-3 | 20 | 289  | 1.29 |      |

**Table S3.** Henry's law region fit for IAST of microporous PIs.

|    | Initial slope<br>(CO <sub>2</sub> ) | Initial slope<br>(CH <sub>4</sub> ) | selectivity |
|----|-------------------------------------|-------------------------------------|-------------|
| AP | 0.335                               | 0.083                               | 4.02        |
| BP | 0.309                               | 0.068                               | 4.53        |
| TP | 0.196                               | 0.036                               | 5.43        |

**Table S4.** 5AP/6FDA-Durene activation energy ( $E_P$ ) of permeation for CO<sub>2</sub>, N<sub>2</sub> and CH<sub>4</sub>

|     | $E_P$ (kJ·mol <sup>-1</sup> ) |                |                 |
|-----|-------------------------------|----------------|-----------------|
|     | CO <sub>2</sub>               | N <sub>2</sub> | CH <sub>4</sub> |
| 5AP | -9.2                          | 7.5            | 6.4             |

## REFERENCES

- Japip, S.; Xiao, Y.; Chung, T.-S. Particle-Size Effects on Gas Transport Properties of 6FDA-Durene/ZIF-71 Mixed Matrix Membranes. *Ind. Eng. Chem. Res.* **2016**, *55*, 9507-9517.
- Lin, R.; Ge, L.; Liu, S.; Rudolph, V.; Zhu, Z. Mixed-Matrix Membranes with Metal–Organic Framework-Decorated CNT Fillers for Efficient CO<sub>2</sub> Separation. *ACS Appl. Mater. Interfaces* **2015**, *7*, 14750-14757.
- Lin, R.; Ge, L.; Diao, H.; Rudolph, V.; Zhu, Z. Ionic Liquids as the MOFs/Polymer Interfacial Binder for Efficient Membrane Separation. *ACS Appl. Mater. Interfaces* **2016**, *8*, 32041-32049.
- Qian, Q.; Wu, A.X.; Chi, W.S.; Asinger, P.A.; Lin, S.; Hypsher, A.; Smith, Z.P. Mixed-Matrix Membranes Formed from Imide-Functionalized UiO-66-NH<sub>2</sub> for Improved Interfacial Compatibility. *ACS Appl. Mater. Interfaces* **2019**, *11*, 31257-31269.
- Japip, S.; Liao, K.S.; Chung, T.S. Molecularly Tuned Free Volume of Vapor Cross-Linked 6FDA-Durene/ZIF-71 MMMs for H<sub>2</sub>/CO<sub>2</sub> Separation at 150 degrees C. *Adv. Mater.* **2017**, *29*.
- Wang, H.; Zhang, K.; Ho Li, J.P.; Huang, J.; Yuan, B.; Zhang, C.; Yu, Y.; Yang, Y.; Lee, Y.; Li, T. Engineering Plasticization Resistant Gas Separation Membranes Using Metal–Organic Nanocapsules. *Chem. Sci.* **2020**, *11*, 4687-4694.
- Mashhadikhan, S.; Moghadassi, A.; Ebadi Amooghin, A.; Sanaeepur, H. Interlocking a Synthesized Polymer and Bifunctional Filler Containing the Same Polymer's Monomer for Conformable Hybrid Membrane Systems. *J. Mater. Chem. A* **2020**, *8*, 3942-3955.
- Bachman, J.E.; Long, J.R. Plasticization-Resistant Ni<sub>2</sub>(dobdc)/Polyimide Composite Membranes for

- the Removal of CO<sub>2</sub> from Natural Gas. *Energ. Environ. Sci.* **2016**, *9*, 2031-2036.
9. Japip, S.; Liao, K.-S.; Xiao, Y.; Chung, T.-S. Enhancement of Molecular-Sieving Properties by Constructing Surface Nano-Metric Layer via Vapor Cross-Linking. *J. Membrane Sci.* **2016**, *497*, 248-258.
  10. Vu, M.-T.; Lin, R.; Diao, H.; Zhu, Z.; Bhatia, S.K.; Smart, S. Effect of Ionic Liquids (ILs) on MOFs/Polymer Interfacial Enhancement in Mixed Matrix Membranes. *J. Membrane Sci.* **2019**, 587.
  11. Jusoh, N.; Yeong, Y.F.; Lau, K.K.; M. Shariff, A. Enhanced Gas Separation Performance Using Mixed Matrix Membranes Containing Zeolite T and 6FDA-Durene Polyimide. *J. Membrane Sci.* **2017**, 525, 175-186.
  12. Maserati, L.; Meckler, S.M.; Bachman, J.E.; Long, J.R.; Helms, B.A. Diamine-Appended Mg<sub>2</sub>(dobpdc) Nanorods as Phase-Change Fillers in Mixed-Matrix Membranes for Efficient CO<sub>2</sub>/N<sub>2</sub> Separations. *Nano Lett.* **2017**, *17*, 6828-6832.
  13. Aguilar-Lugo, C.; Suárez-García, F.; Hernández, A.; Miguel, J.A.; Lozano, Á.E.; de la Campa, J.G.; Álvarez, C. New Materials for Gas Separation Applications: Mixed Matrix Membranes Made from Linear Polyimides and Porous Polymer Networks Having Lactam Groups. *Ind. Eng. Chem. Res.* **2019**, *58*, 9585-9595.
  14. Chi, W.S.; Sundell, B.J.; Zhang, K.; Harrigan, D.J.; Hayden, S.C.; Smith, Z.P. Mixed-Matrix Membranes Formed from Multi-Dimensional Metal-Organic Frameworks for Enhanced Gas Transport and Plasticization Resistance. *ChemSusChem* **2019**, *12*, 2355-2360.
  15. Yang, Y.; Goh, K.; Wang, R.; Bae, T.H. High-Performance Nanocomposite Membranes Realized by Efficient Molecular Sieving with CuBDC Nanosheets. *Chem. Commun.* **2017**, *53*, 4254-4257.
  16. Hasebe, S.; Aoyama, S.; Tanaka, M.; Kawakami, H. CO<sub>2</sub> Separation of Polymer Membranes Containing Silica Nanoparticles with Gas Permeable Nano-Space. *J. Membrane Sci.* **2017**, *536*, 148-155.
  17. Liu, G.; Labreche, Y.; Chernikova, V.; Shekhah, O.; Zhang, C.; Belmabkhout, Y.; Eddaoudi, M.; Koros, W.J. Zeolite-like MOF Nanocrystals Incorporated 6FDA-Polyimide Mixed-Matrix Membranes for CO<sub>2</sub>/CH<sub>4</sub> Separation. *J. Membrane Sci.* **2018**, *565*, 186-193.
  18. Yang, Y.; Goh, K.; Weerachanchai, P.; Bae, T.-H. 3D Covalent Organic Framework for Morphologically Induced High-Performance Membranes with Strong Resistance Toward Physical Aging. *J. Membrane Sci.* **2019**, *574*, 235-242.
  19. Sabetghadam, A.; Seoane, B.; Keskin, D.; Duim, N.; Rodenas, T.; Shahid, S.; Sorribas, S.; Le Guillouzer, C.; Clet, G.; Tellez, C., et al. Metal Organic Framework Crystals in Mixed-Matrix Membranes: Impact of the Filler Morphology on the Gas Separation Performance. *Adv. Funct. Mater.* **2016**, *26*, 3154-3163.
  20. Ahmadi, M.; Tas, E.; Kilic, A.; Kumbaraci, V.; Talinli, N.; Ahunbay, M.G.; Tanteekin-Ersolmaz, S.B. Highly CO<sub>2</sub> Selective Microporous Metal-Imidazolate Framework-Based Mixed Matrix Membranes. *ACS Appl. Mater. Interfaces* **2017**, *9*, 35936-35946.
  21. Venna, S.R.; Lartey, M.; Li, T.; Spore, A.; Kumar, S.; Nulwala, H.B.; Luebke, D.R.; Rosi, N.L.; Albenze, E. Fabrication of MMMs with Improved Gas Separation Properties Using Externally-Functionalized MOF Particles. *J. Mater. Chem. A* **2015**, *3*, 5014-5022.
  22. Vu, D.Q.; Koros, W.J.; Miller, S.J. Mixed Matrix Membranes Using Carbon Molecular Sieves - I. Preparation and Experimental Results. *J. Membrane Sci.* **2003**, *211*, 311-334.
  23. Rangel Rangel, E.; Maya, E.M.; Sánchez, F.; de Abajo, J.; de la Campa, J.G. Gas Separation Properties of Mixed-Matrix Membranes Containing Porous Polyimides Fillers. *J. Membrane Sci.* **2013**, *447*, 403-412.
  24. Rodenas, T.; Luz, I.; Prieto, G.; Seoane, B.; Miro, H.; Corma, A.; Kapteijn, F.; Llabres, I.X.F.X.; Gascon, J. Metal-Organic Framework Nanosheets in Polymer Composite Materials for Gas Separation. *Nat. Mater.* **2015**, *14*, 48-55.
  25. Lin, R.; Ge, L.; Hou, L.; Strounina, E.; Rudolph, V.; Zhu, Z. Mixed Matrix Membranes with Strengthened MOFs/Polymer Interfacial Interaction and Improved Membrane Performance. *ACS Appl. Mater. Interfaces* **2014**, *6*, 5609-5618.
  26. Wang, Z.; Wang, D.; Zhang, S.; Hu, L.; Jin, J. Interfacial Design of Mixed Matrix Membranes for Improved Gas Separation Performance. *Adv. Mater.* **2016**, *28*, 3399-3405.
  27. Fan, Y.; Yu, H.; Xu, S.; Shen, Q.; Ye, H.; Li, N. Zn(II)-Modified Imidazole Containing Polyimide/ZIF-8 Mixed Matrix membranes for Gas Separations. *J. Membrane Sci.* **2020**, 597.
